# Supplementary material
Source: PubMed Central journal article supplement (PMC4563737)
Supplement: JCI76765sd.pdf [file JCI76765sd.pdf]

**Supplemental Table 1**

List of oligonucleotides used for quantitative PCR analysis

| <b>Gene</b>       | <b>Strand</b> | <b>Sequence</b>                       |
|-------------------|---------------|---------------------------------------|
| <i>Xbp1s</i>      | Fwd           | CTG AGT CCG AAT CAG GTG CAG           |
|                   | Rev           | GTC CAT GGG AAG ATG TTC TGG           |
| <i>Xbp1u</i>      | Fwd           | GGT CTG CTG AGT CCG CAG CAC TC        |
|                   | Rev           | AGG CTT GGT GTA TAC ATG G             |
| Total <i>Xpb1</i> | Fwd           | GAA CCA GGA GTT AAG AAC ACG           |
|                   | Rev           | AGG CAA CAG TGT CAG AGT C             |
| <i>Nfatc1</i>     | Fwd           | AAC GCC CTG CTG ACC ACC GAT AGC A     |
|                   | Rev           | CCC GGG TGC CTT CCG TCT CAT A         |
| <i>Fos</i>        | Fwd           | CCA AGC GGA GAC AGA TCA ACT T         |
|                   | Rev           | TCC AGT TTT TCC TTC TCT TTC AGC AGA T |
| <i>Rela</i>       | Fwd           | GCT TTC GCA GGA GCA TTA AC            |
|                   | Rev           | CCG AAG CAG GAG CTA TCA AC            |
| <i>jund</i>       | Fwd           | GCC TCA CGC TCT GCC TTT CC            |
|                   | Rev           | CAC ACT CAA CAC GCA ACC AAC G         |
| <i>Spi1</i>       | Fwd           | GCT ATA CCA ACG TCC AAT GC            |
|                   | Rev           | GTT GTT GTG GAC ATG GTG TG            |
| <i>Hspa5</i>      | Fwd           | TTC AGC CAA TTA TCA GCA AAC TCT       |
|                   | Rev           | TTT TCT GAT GTA TCC TCT TCA CCA GT    |
| <i>Eif2ak3</i>    | Fwd           | GCC ACA GAG AAC AGC GTG TA            |
|                   | Rev           | CGG CAG AGG AAT AAT TGC AT            |
| <i>Actb</i>       | Fwd           | CTG AAC CCT AAG GCC AAC CGT G         |
|                   | Rev           | GGC ATA CAG GGA CAG CAC AGC C         |
| <i>Atf4</i>       | Fwd           | CGA GAT GAG CTT CCT GAA CAG C         |
|                   | Rev           | GGA AAA GGC ATC CTC CTT GC            |
| <i>Ern1</i>       | Fwd           | AAG CAG CTC CAG TTT TTC CA            |
|                   | Rev           | CTC TCC AAC TGC CGT ACG AT            |
| <i>Ctsk</i>       | Fwd           | ACG GAG GCA TTG ACT CTG AAG ATG       |
|                   | Rev           | GGA AGC ACC AAC GAG AGG AGA AAT       |
| <i>Acp5</i>       | Fwd           | CCA ATG CCA AAG AGA TCG CC            |
|                   | Rev           | TCT GTG CAG AGA CGT TGC CAA G         |

## Supplemental Table 2

List of oligonucleotides used for chromatin immunoprecipitation assays in Figure 7

| Location | Strand | Sequence                                |
|----------|--------|-----------------------------------------|
| -764~561 | Fwd    | CCG GGA CGC CCA TGC AAT CTG TTA GTA ATT |
|          | Rev    | GCG GGT GCC CTG AGA AAG CTA CTC TCC CTT |
| -942~811 | Fwd    | TAC AAA GCA CCC TAT GGT CC              |
|          | Rev    | TGG ATT GCT TGC TGT ACG AG              |

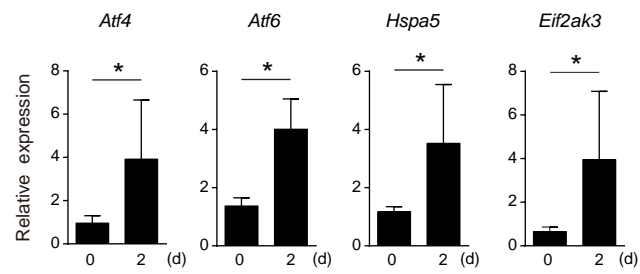

### Supplemental Figure 1

ER stress related genes are induced in BMMs after RANKL stimulation. BMMs collected from WT mice were incubated in with sRANKL (50 ng/ml). The expression levels of *Atf4*, *Atf6*, *Hspa5*, and *Eif2ak3* transcripts were quantitatively analyzed after 0 and 2 days. n = 3 repeats. Values are means  $\pm$  SD. \*p < 0.05. Statistical analysis was performed using Student's *t*-test.

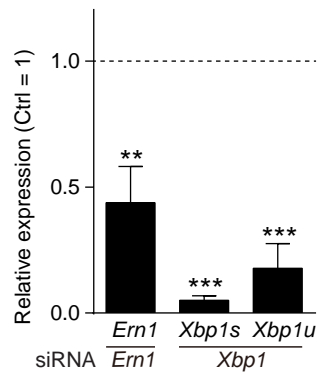

### Supplemental Figure 2

siRNA-mediated gene silencing of *Ern1* and *Xbp1* transcripts in BMMs. BMMs collected from WT mice were transfected with siRNA against *Ern1* or *Xbp1*. The relative expression levels of *Ern1*, *Xbp1s*, and *Xbp1u* mRNA were quantitatively analyzed. The expression levels of each transcript in control siRNA-transfected BMM are set to 1. n = 4 repeats. Values are means  $\pm$  SD. \*\*p < 0.005, \*\*\*p < 0.0005. Statistical analysis was performed using Student's *t*-test.

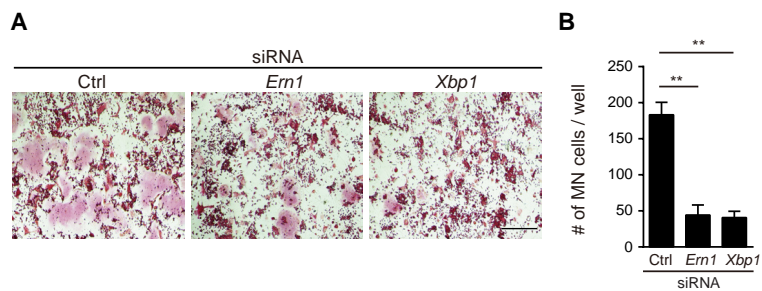

### Supplemental Figure 3

Gene silencing of *Ern1* or *Xbp1* in RAW264.7 cells suppresses RANKL-induced osteoclastogenesis. **(A)** Representative photomicrographs of RAW264.7 cells treated with control (Ctrl) siRNA or with siRNA against *Ern1* or *Xbp1*. The cells were incubated with sRANKL (50 ng/ml) for 4 days and stained for TRAP. Bar, 200  $\mu$ m. **(B)** The number of TRAP-positive multi-nucleated (MN) cells in each well. n = 3 repeats. Values are means  $\pm$  SD. \*\*p < 0.005. Statistical analysis was performed using Student's *t*-test.

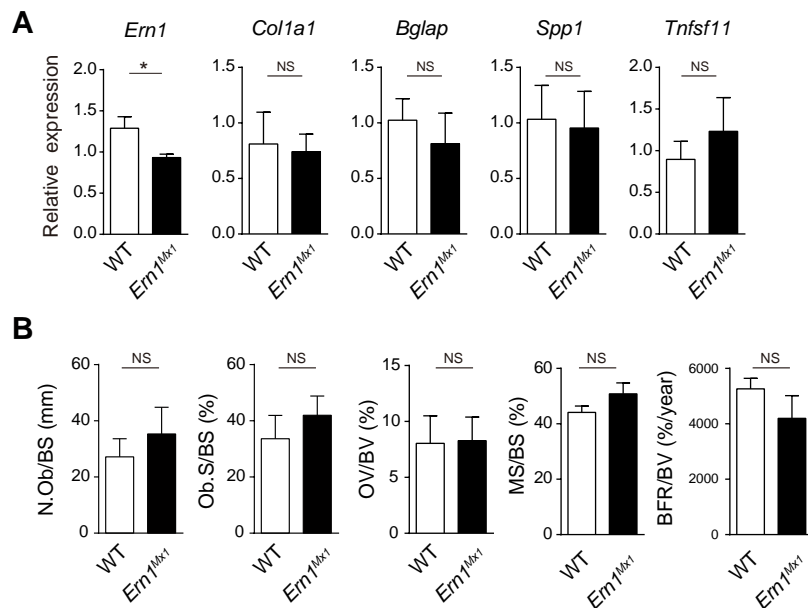

#### Supplemental Figure 4

No significant changes in bone formation in *Ern1<sup>Mx1</sup>* mice. **(A)** Relative transcript expression levels of *Ern1*, *Col1a1*, *Bglap* (encodes osteocalcin), *Spp1* (encodes osteopontin), and *Tnfsf11* (encodes RANKL) in osteoblasts in WT and *Ern1<sup>Mx1</sup>* mice.  $n = 4$  mice/group. **(B)** Histomorphometric analysis of the tibial metaphysis ( $n = 3-7$  mice/group). N.Ob/BS, osteoblast number/bone surface; Ob.S/BS, osteoblast surface/bone surface, OV/BV, osteoid volume/bone volume; MS/BS, mineralizing surface/bone surface; BFR/BV, bone formation rate/bone volume. Values are means  $\pm$  SD. \* $p < 0.05$ . NS, not significant. Statistical analysis was performed using Student's *t*-test.
